# Supplementary material for: UPRER promotes lipophagy independent of chaperones to extend life span
Source: PubMed Central journal article supplement — Sci Adv. 2020 Jan 1;6(1):eaaz1441. doi: 10.1126/sciadv.aaz1441 (PMC6938708; doi:10.1126/sciadv.aaz1441), 2020-01-01
Supplement: aaz1441_SM.pdf [file aaz1441_SM.pdf]

## Supplementary Materials for

### **UPR<sup>ER</sup> promotes lipophagy independent of chaperones to extend life span**

Joseph R. Daniele, Ryo Higuchi-Sanabria, Jenni Durieux, Samira Monshietehadi, Vidhya Ramachandran, Sarah U. Tronnes, Naame Kelet, Melissa Sanchez, Melissa G. Metcalf, Gilberto Garcia, Phillip A. Frankino, Camila Benitez, Mandy Zeng, Daniel J. Esping, Larry Joe, Andrew Dillin\*

\*Corresponding author. Email: dillin@berkeley.edu

Published 1 January 2020, *Sci. Adv.* **6**, eaaz1441 (2020)

DOI: 10.1126/sciadv.aaz1441

#### **This PDF file includes:**

Fig. S1. ER remodeling of the intestine through UPR<sup>ER</sup> activation requires neuronal nonautonomous signaling.

Fig. S2. LAMPro technology can be reliably used to quantify LDs using DHS-3::GFP.

Fig. S3. ER remodeling is coincident with more intestinal lysosomes in neuronal *xbp-1s* animals.

Fig. S4. Lipid depletion in neuronal *xbp-1s* is dependent on *xbp-1* and *ehbp-1*.

Fig. S5. Knockdown of lipophagic components does not affect chaperone induction by *xbp-1s*.

Table S1. Statistics for all life-span data.

Table S2. Organisms and strains used.

Sequences used for cloning

## Supplemental Information

### Supplemental Figures

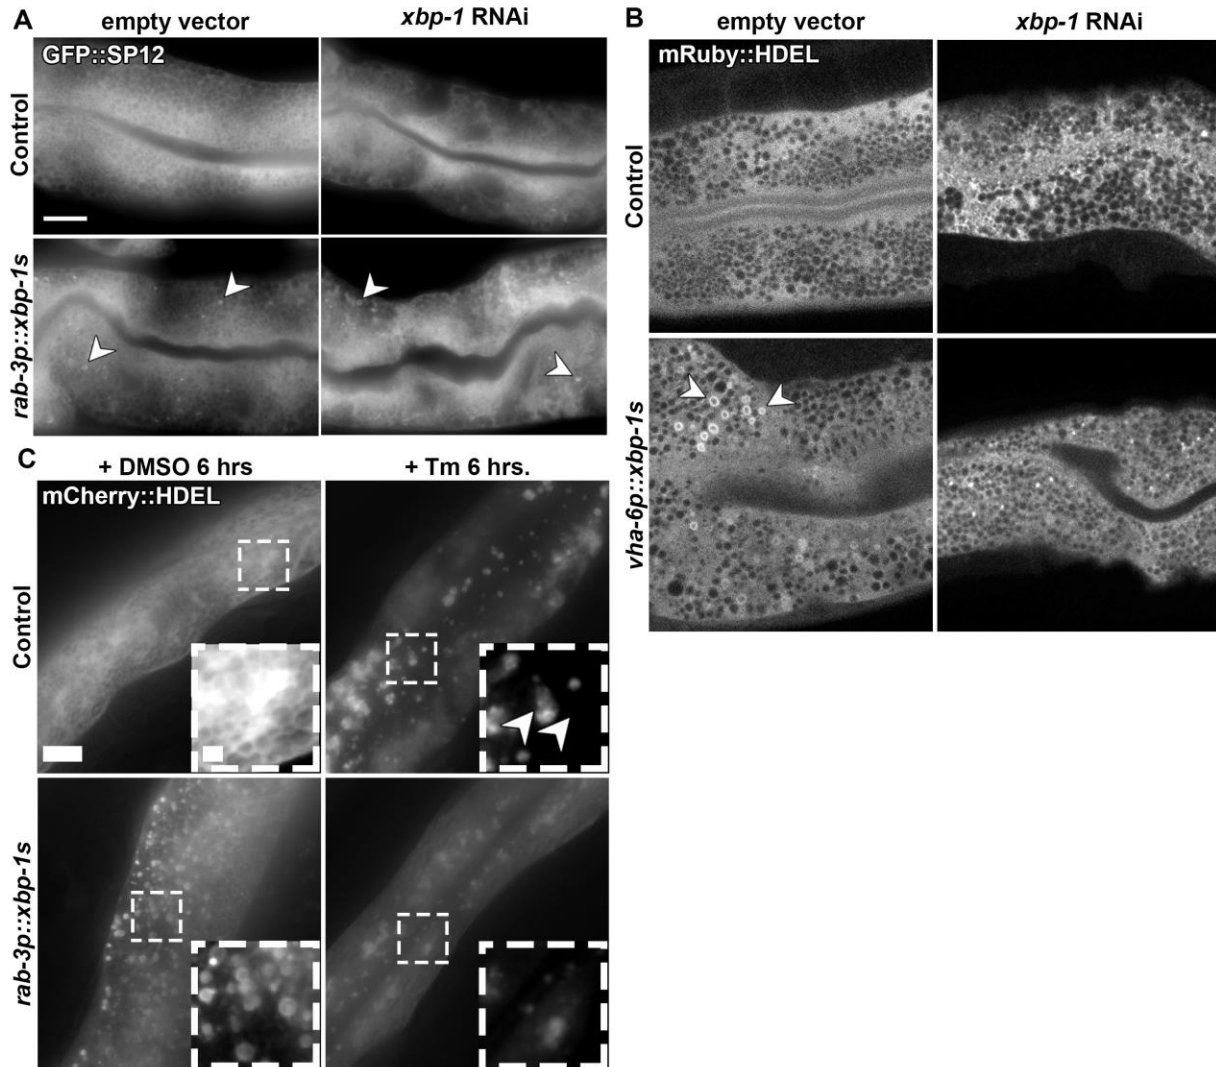

**Fig. S1. ER remodeling of the intestine through UPR<sup>ER</sup> activation requires neuronal nonautonomous signaling.** (A) ER morphology in intestine of control and neuronal *xbp-1s* animals. An alternate ER transmembrane marker (VS25: *vha-6p::GFP::C34B2.10 (SP12)*) is used here to demonstrate that phenotypes depicted are not an artifact of luminal ER fluorophores. While the ER remodeling is much more subtle using this marker, clear spherical structures can be detected as marked by arrowheads. Animals were grown from hatch on ev or *xbp-1* RNAi and live-imaged using a compound microscope. Scale = 10  $\mu$ m. (B) Representative micrographs of ER morphology (mRuby::HDEL) in intestine of control and intestinal *xbp-1s* (*vha-6p::xbp-1s*) animals. ER remodeling is depicted by arrowheads. (C) Representative compound micrographs of ER (mCherry::HDEL) with and without 6 hours treatment with 25 ng/ $\mu$ L tunicamycin. Briefly, animals were treated in tunicamycin in M9 liquid spinning at 20°C or with 1% DMSO as a control. Drugs were washed out and animals were live-imaged immediately

on a compound microscope. Scale bar is 10 $\mu$ m. For A-C, animals are imaged at late Day 2 of adulthood.

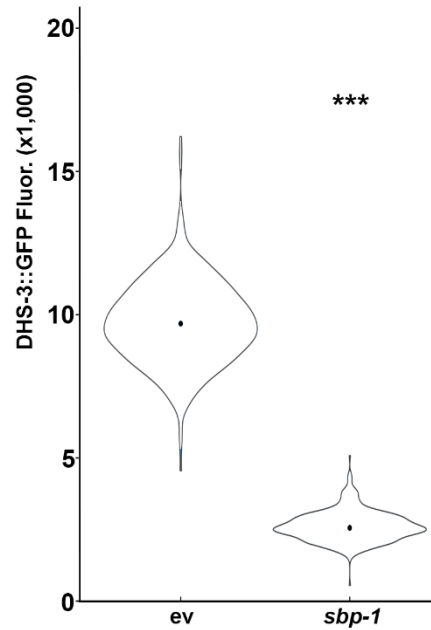

**Fig. S2. LAMPro technology can be reliably used to quantify LDs using DHS-3::GFP.**

Quantification of lipid droplets (LDs) (via DHS-3::GFP fluorescence) in animals grown on *ev* or *sbp-1* RNAi from hatch. *sbp-1* is used as a control for decreased lipids. \*\*\* =  $p < 0.001$  using non-parametric Mann-Whitney testing. Plots are representative of three biological replicates and  $n = 921$  (*ev*), 435 (*sbp-1*). Animals were imaged at late Day 2 of adulthood.

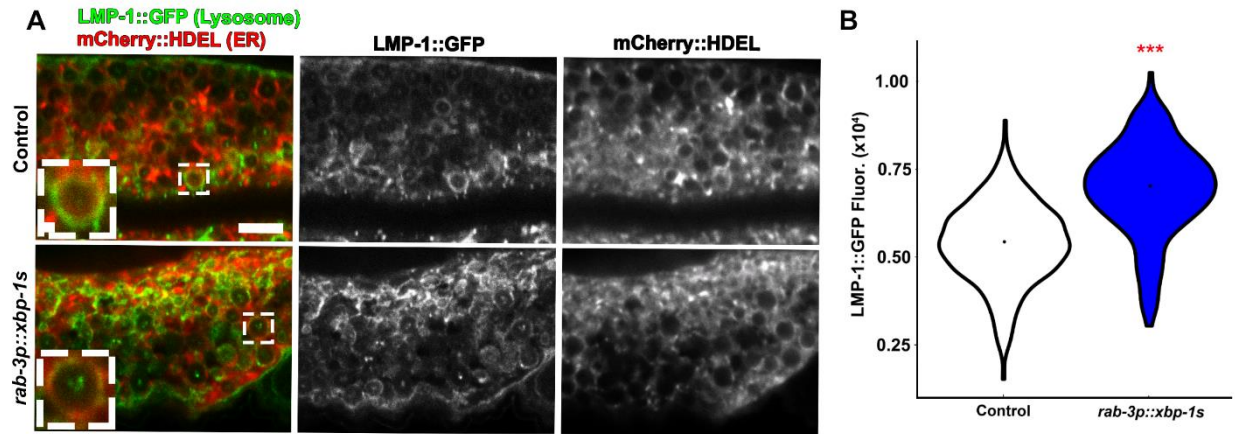

**Fig. S3. ER remodeling is coincident with more intestinal lysosomes in neuronal *xbp-1s* animals.** (A) Confocal micrographs of intestinal ER (*vha-6p::mCherry::HDEL*) and lysosomes (*vha-6p::lmp-1::GFP*), in fixed animals, with and without *rab-3p::xbp-1s*. Scale = 5  $\mu$ m (and 0.5  $\mu$ m for inset). (B) Quantification of lysosomes (via LMP-1::GFP) in control and *rab-3p::xbp-1s* animals. \*\*\* =  $p < 0.001$  using non-parametric Mann-Whitney testing.  $n > 50$  animals per condition. For A-B, animals are imaged at late Day2 of adulthood.

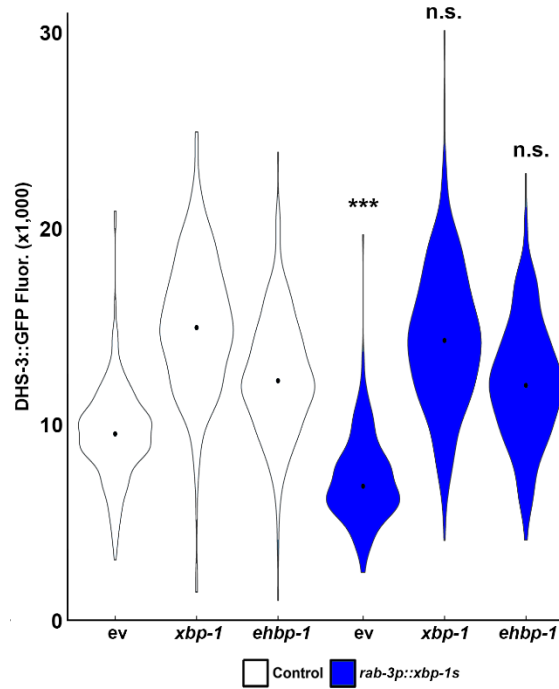

**Fig. S4. Lipid depletion in neuronal *xbp-1s* is dependent on *xbp-1* and *ehbp-1*.**

Quantification of LDs (via DHS-3::GFP) in control and *rab-3p::xbp-1s* animals grown on *ev*, *xbp-1*, or *ehbp-1* RNAi from hatch. \*\*\* =  $p < 0.001$ , n.s. =  $p > 0.10$  using non-parametric Mann-Whitney testing. Plots are representative of four biological replicates and  $n = 320-484$  animals per strain. Animals are imaged at late Day 2 of adulthood.

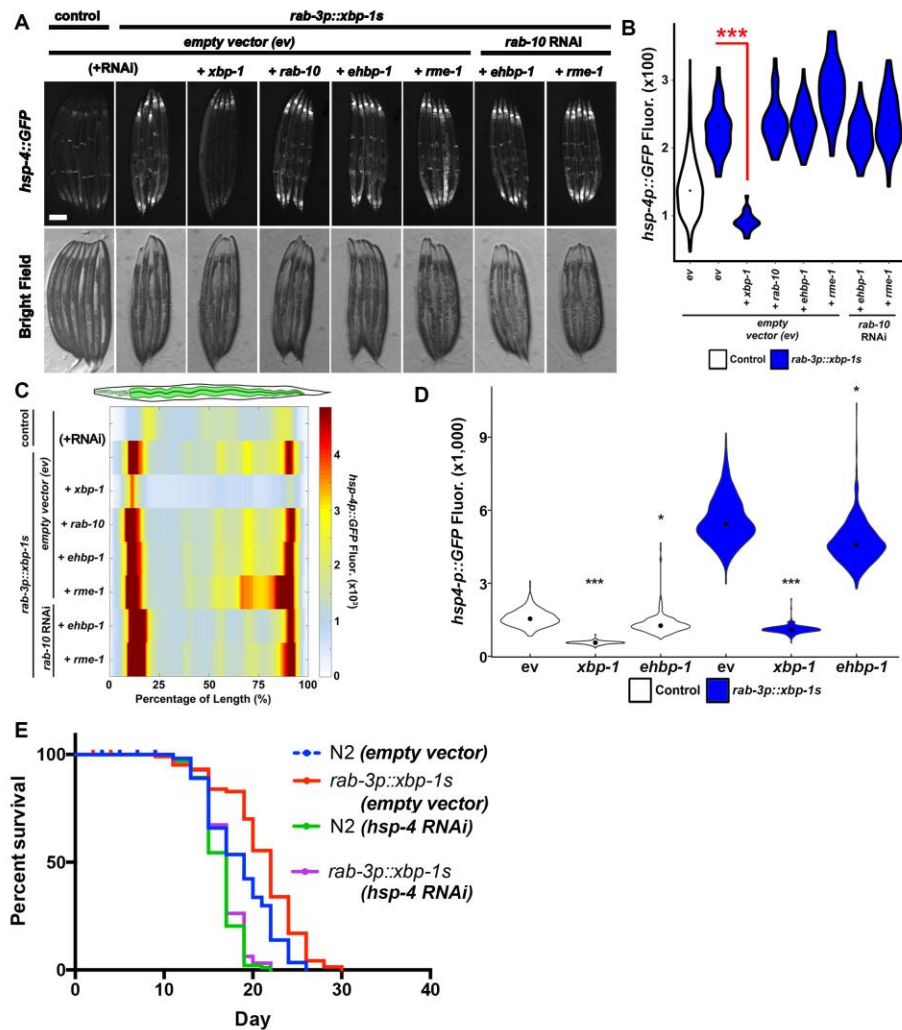

**Fig. S5. Knockdown of lipophagic components does not affect chaperone induction by *xbp-1s*.** (A) Fluorescent light micrographs of *hsp-4p::GFP* UPR<sup>ER</sup> reporter animals, imaged as Day 2 adults, and treated with the indicated RNAi(s) from hatch. Scale = 100  $\mu$ m. (B) Quantification of *hsp-4p::GFP* fluorescence in control (white) and *rab-3p::xbp-1s* (blue) nematodes, using a Biosorter, following various RNAi treatments. \*\*\* =  $p < 0.001$  by Mann-Whitney. Wild-type controls on *xbp-1* and *ehbp-1* RNAis can be found in panel (d). (C) Median profiles of GFP fluorescence of the *hsp-4p::GFP* animals, under various RNAi treatments, in a *rab-3p::xbp-1s* background, following alignment. Plots are representative of three biological replicates and derived from  $n = 28-71$  per strain. (D) Quantification of *hsp-4p::GFP* fluorescence in control (white) and *rab-3p::xbp-1s* (blue) nematodes, using a Biosorter, following various RNAi treatments. \*\*\* =  $p < 0.001$ , \* =  $p < 0.10$  using non-parametric Mann-Whitney testing.  $p$ -values are in comparison to their corresponding ev controls. Data is representative of two independent trials with  $n = 224-573$  per strain. (E) Lifespan data for wild-type N2 animals or neuronal *xbp-1s* (*rab-3p::xbp-1s*) animals treated with EV or *hsp-4* RNAi from hatch. RNAi knockdown of *hsp-4* is sufficient to eliminate the lifespan extension normally seen in neuronal

*xbp-1s* animals. See **table S1** for lifespan statistics. For A-D, animals are imaged at Day 1 of adulthood.



**Table S1. Statistics for all life-span data.**

Supplemental Table S1. Statistical Analyses of Lifespan Data

| Corresponding Figure | Strain, Treatment                                               | Median Lifespan [days] | # Deaths/# Total | % Change in Median Lifespan | p-value<br>Log-rank (Mantel-Cox) |
|----------------------|-----------------------------------------------------------------|------------------------|------------------|-----------------------------|----------------------------------|
| 2f                   | N2, vector RNAi, 1% DMSO                                        | 22                     | 95/120           | n/a                         | n/a                              |
|                      | <i>rab-3p::xbp-1s</i> , vector RNAi, 1% DMSO                    | 26                     | 94/120           | 1.2                         | <0.0001                          |
|                      | N2, <i>xbp-1</i> RNAi, 1% DMSO                                  | 14                     | 92/120           | 0.6                         | <0.0001                          |
|                      | <i>rab-3p::xbp-1s</i> , <i>xbp-1</i> RNAi, 1% DMSO              | 15                     | 95/120           | 0.7                         | <0.0001                          |
|                      | N2, <i>ehbp-1</i> RNAi, 1% DMSO                                 | 16                     | 92/120           | 0.7                         | <0.0001                          |
|                      | <i>rab-3p::xbp-1s</i> , <i>ehbp-1</i> RNAi, 1% DMSO             | 15                     | 96/120           | 0.7                         | <0.0001                          |
| 2g                   | N2, vector RNAi, 25ng/μL tunicamycin                            | 14                     | 97/120           | n/a                         | n/a                              |
|                      | <i>rab-3p::xbp-1s</i> , vector RNAi, 25ng/μL tunicamycin        | 18                     | 109/120          | 1.3                         | <0.0001                          |
|                      | N2, <i>xbp-1</i> RNAi, 25ng/μL tunicamycin                      | 12                     | 98/120           | 0.9                         | <0.0001                          |
|                      | <i>rab-3p::xbp-1s</i> , <i>xbp-1</i> RNAi, 25ng/μL tunicamycin  | 12                     | 101/120          | 0.9                         | <0.0001                          |
|                      | N2, <i>ehbp-1</i> RNAi, 25ng/μL tunicamycin                     | 14                     | 111/120          | 1.0                         | 0.2271                           |
|                      | <i>rab-3p::xbp-1s</i> , <i>ehbp-1</i> RNAi, 25ng/μL tunicamycin | 14                     | 111/120          | 1.0                         | 0.8208                           |
| S5e                  | N2, vector RNAi                                                 | 19                     | 100/120          | n/a                         | n/a                              |
|                      | <i>rab-3p::xbp-1s</i> , vector RNAi                             | 22                     | 88/120           | 1.2                         | <0.0001                          |
|                      | N2, <i>hsp-4</i> RNAi                                           | 17                     | 102/120          | 0.9                         | <0.0001                          |
|                      | <i>rab-3p::xbp-1s</i> , <i>hsp-4</i> RNAi                       | 17                     | 96/120           | 0.9                         | <0.0001                          |
| 3d                   | N2, vector RNAi                                                 | 17                     | 101/120          | n/a                         | n/a                              |
|                      | <i>vha-6p::ehbp-1</i> , vector RNAi                             | 21                     | 98/120           | 1.2                         | 0.0221                           |

**Table S2. Organisms and strains used.**

| BACTERIAL AND VIRUS STRAINS                                                                                                                                                                         |                           |     |
|-----------------------------------------------------------------------------------------------------------------------------------------------------------------------------------------------------|---------------------------|-----|
| OP50                                                                                                                                                                                                | CGC                       | N/A |
| HT115                                                                                                                                                                                               | CGC                       | N/A |
| DH5 $\alpha$                                                                                                                                                                                        | Invitrogen                |     |
| EXPERIMENTAL MODELS: ORGANISMS/STRAINS                                                                                                                                                              |                           |     |
| <i>C. elegans</i> : Bristol (N2) strain as wild type (WT)                                                                                                                                           | CGC                       | N2  |
| <i>C. elegans</i> : AGD927: uthIs270 [rab-3p::Xbp-1s, myo-2p::tdTomato]                                                                                                                             | (Taylor and Dillin, 2013) | N/A |
| <i>C. elegans</i> : AGD928: uthIs270[rab-3p::Xbp-1s, myo-2p::tdTomato]; zcls4[hsp-4p::GFP]                                                                                                          | (Taylor and Dillin, 2013) | N/A |
| <i>C. elegans</i> : AGD1289: N2, uthIs368[rab-3p::HSF-1 FL, myo-2p::tomato]                                                                                                                         | (Douglas et al., 2015)    | N/A |
| <i>C. elegans</i> : AGD1376: hjSi158[vha-6p::SEL-1(1-79)::mCherry::HDEL]; uthIs270[rab-3p::Xbp-1s, myo-2p::tdTomato]                                                                                | This study                | N/A |
| <i>C. elegans</i> : AGD1415: pwIs23[vit-2::GFP]                                                                                                                                                     | This study                | N/A |
| <i>C. elegans</i> : AGD1771: N2, uthIs464[rgef-1p::Xbp-1s, myo-2p::tdTomato]                                                                                                                        | This study                | N/A |
| <i>C. elegans</i> : AGD2048: dhs-3p::dhs-3::GFP; hjSi158 [vha-6p::SEL-1(1-79)::mCherry::HDELlet-858 3' UTR]                                                                                         | This study                | N/A |
| <i>C. elegans</i> : AGD2065: dhs-3p::dhs-3::GFP; hjSi158 [vha-6p::SEL-1(1-79)::mCherry::HDELlet-858 3' UTR]; uthIs270[rab-3p::Xbp-1s, myo-2p::tdTomato]                                             | This study                | N/A |
| <i>C. elegans</i> : AGD2129: pwIs23[vit-2::GFP]; uthIs270 [rab-3p::Xbp-1s, myo-2p::tdTomato]                                                                                                        | This study                | N/A |
| <i>C. elegans</i> : AGD2192: unc-119(ed3) III; uthSi60[vha-6p::ERss::mRuby::HDEL::unc-54 3'UTR cb-unc-119(+)] IV                                                                                    | This study                | N/A |
| <i>C. elegans</i> : AGD2230: uthIs488[vha-6p::xbp-1s, myo-2p::BFP]; unc-119(ed3) III; uthSi60[vha-6p::ERss::mRuby::HDEL::unc-54 3'UTR cb-unc-119(+)] IV                                             | This study                | N/A |
| <i>C. elegans</i> : AGD2267: uthIs270 [rab-3p::xbp-1s, myo-2p::tdTomato]; unc-119(ed3)III; uthSi60 [vha-6p::Erss::mRuby::HDEL::unc-54 3'UTR cb-unc-119(+)]                                          | This study                | N/A |
| <i>C. elegans</i> : AGD2349: uthIs270[rab-3p::Xbp-1s, myo-2p::tdTomato]; vha-6p::GFP::C34B2.10(SP12)+unc119(+); unc-119(ed3) III; uthSi60[vha-6p::ERss::mRuby::HDEL::unc-54 3'UTR cb-unc-119(+)] IV | This study                | N/A |
| <i>C. elegans</i> : AGD2363: N2, uthEx911[vha-6p::ehbp-1::unc-54 3'UTR; myo-2p::GFP]                                                                                                                | This study                | N/A |
| <i>C. elegans</i> : AGD2364: N2, uthEx912[vha-6p::ehbp-1::unc-54 3'UTR; myo-2p::GFP]                                                                                                                | This study                | N/A |

|                                                                                                                                                                           |                                                                               |                                                  |
|---------------------------------------------------------------------------------------------------------------------------------------------------------------------------|-------------------------------------------------------------------------------|--------------------------------------------------|
| <i>C. elegans</i> : AGD2365: N2, uthEx911[vha-6p::ehbp-1::unc-54 3'UTR; myo-2p::GFP]; unc-119(ed3) III; uthSi60[vha-6p::ERss::mRuby::HDEL::unc-54 3'UTR cb-unc-119(+)] IV | This study                                                                    | N/A                                              |
| <i>C. elegans</i> : AGD2366: N2, uthEx911[vha-6p::ehbp-1::unc-54 3'UTR; myo-2p::GFP]; dhs-3p::dhs-3::GFP; hjSi158[vha-6p::SEL-1(1-79)::mCherry::HDELlet-858 3' UTR]       | This study                                                                    | N/A                                              |
| <i>C. elegans</i> : AGD2367: N2, uthEx911[vha-6p::ehbp-1::unc-54 3'UTR; myo-2p::GFP]; zcls4(hsp-4p::GFP)V                                                                 | This study                                                                    | N/A                                              |
| <i>C. elegans</i> : EG6703: unc-119(ed3) III; cxTi10816 IV; oxEx1582                                                                                                      | CGC                                                                           | EG6703                                           |
| <i>C. elegans</i> : SJ4005: zcls4(hsp-4p::GFP)V                                                                                                                           | (Taylor and Dillin, 2013)                                                     | SJ4005                                           |
| <i>C. elegans</i> : VS25: vha-6p::GFP::C34B2.10(SP12)+unc119(+); unc-119(ed3) III                                                                                         | CGC                                                                           | VS25                                             |
| <i>C. elegans</i> : VS30: hjSi158[vha-6p::SEL-1(1-79)::mCherry::HDELlet-858 3' UTR]                                                                                       | CGC                                                                           | VS30                                             |
| OLIGONUCLEOTIDES – ALL OLIGOS ORDERED FROM IDT                                                                                                                            |                                                                               |                                                  |
| Primer Name                                                                                                                                                               | Primer Sequence                                                               | Primer Purpose                                   |
| JRD260 F_all_xbp1s_vectors                                                                                                                                                | TAGCATTTCGTAGA<br>ATTCCAACCTGAGC                                              | forward primer to clone vector side of pJRD16    |
| JRD262 R_myo3_vector_xbp1s                                                                                                                                                | ctagatggatctagtggtc<br>gtggg                                                  | reverse primer to clone vector side of pJRD16    |
| JRD255 R_all_xbp1s_inserts                                                                                                                                                | GCGCTCAGTTGGA<br>ATTCTACGAATGC<br>TATTAATTTTGGAA<br>GAAATTTAGGTCG<br>ATTG     | Reverse primer to clone xbp-1s insert for pJRD16 |
| JRD257 F_xbp1s_insert_myo3                                                                                                                                                | ctagatggatctagtggtc<br>gtggg                                                  | Forward primer to clone xbp-1s insert for pJRD16 |
| gg288F                                                                                                                                                                    | ATAGCATTTCGTAG<br>CGAATGCGTATTG<br>TaccggaccagtcAAC<br>TCTCTTATCAAGG<br>AAAAC | Forward primer to PCR<br>ERSS::mRuby for pGIL122 |
| gg22R                                                                                                                                                                     | aagtcagaggcacgggc<br>gagatgTTAaagttc<br>gtcatgTCCTCCTCC<br>AAGTCCAG           | Reverse primer to PCR<br>ERSS::mRuby for pGIL122 |
| gg153F                                                                                                                                                                    | catctcgcgcccggtg                                                              | Forward primer to PCR PCR vector for pGIL122     |

|                                                                                                                 |                                                         |                                                |
|-----------------------------------------------------------------------------------------------------------------|---------------------------------------------------------|------------------------------------------------|
| gg45R                                                                                                           | ttttatggggtttgtagggttt<br>ag                            | Reverse primer to<br>PCR vector for<br>pGIL122 |
| SM8 vha6p-ehbp F1                                                                                               | cctaccaaaccataaa<br>aaatggcgggtattctcgt<br>cg           | Forward primer to<br>PCR ehbp-1 for<br>pSM1    |
| SM9 vha-6p-ehbp R1                                                                                              | ATTATCAACTTCTA<br>CTCACtctttttcgaatg<br>aatttttgctgaaca | Reverse primer to<br>PCR ehbp-1 for<br>pSM1    |
| SM10 vha6-ehbp1 F2                                                                                              | atcattcgaaaaagaG<br>TGAGTAGAAGTTG<br>ATAATTTGAAAGT<br>G | Forward primer to<br>PCR vector for<br>pSM1    |
| SM11 vha6-ehbp1 R2                                                                                              | cgacgaagaataccgc<br>catttttatggggtttgtag<br>gtttagtc    | Reverse primer to<br>PCR vector for<br>pSM1    |
| RECOMBINANT DNA                                                                                                 |                                                         |                                                |
| pCFJ356: Integration vector for EG6703 MOSCI:<br>contains Right xcTi10816, cb-unc-119(+), and Left<br>cxTi10816 | Addgene                                                 | 34871                                          |
| pCFJ601: MOS-1 transposase                                                                                      | Addgene                                                 | 34874                                          |
| pCFJ90: myo-2p::mCherry::unc-54 3' UTR                                                                          | Addgene                                                 | 19327                                          |
| pCFJ104: myo-3p::mCherry::unc-54 3' UTR                                                                         | Addgene                                                 | 19328                                          |
| pGH8: rab-3p::mCherry::unc-54 3' UTR                                                                            | Addgene                                                 | 19359                                          |
| pEK1: myo-2p::GFP::unc-54 3' UTR                                                                                | This study                                              | N/A                                            |
| pEK2: myo-2p::tdtomato::unc-54 3' UTR                                                                           | This study                                              | N/A                                            |
| pRT5: pAD1 rgef-1p::xbp-1s cDNA::unc-54 3'UTR                                                                   | (Taylor and Dillin,<br>2013)                            | N/A                                            |
| pSM1: vha-6p::ehbp-1::ehbp-1 3'UTR                                                                              | This study                                              | N/A                                            |
| pGIL122: pCFJ356::vha-6p::hsp-4<br>ERSS::mRuby::HDEL::unc-54 3' UTR                                             | This study                                              | N/A                                            |

## Sequences used for cloning

### pSM1 (cloned into pCFJ90 backbone replacing myo-2p::mCherry with vha-6p::ehbp-1 sequence using Gibson)

vha-6p:

gcattgacctttataggtgcgctctacgcaattcaccagctgaacaatggagttgagcctaataactaaaattttgaatgctttac  
aaaaatattttcagatcttcgagatcatgaaaactatcaaacagcagcgcctggagcaatcagatcgttccacaatattcaggtg  
atatgcaatcgttttagactacatttcgtaagttgctacttcagagataaaactgtaatttttaaatttcagcgcgaaacgcggaggaaag  
tctgatcctgtaacaaatacataaatcgttcctcgcctgatctcacggagatattgccagcatgctcaacgttgccagtgatgaatcaa  
gcacagaactgcattaagatactatttactcgcatactttgttcacataggtttttaaatcatattttatgcatcatttatcatattcaatgca  
tcattcatatcatagtcaataaaaagggtgatttctatgcttgggttcaaatgctgactttggtaaaaagaacgcgctgcctattgcct  
atcttggcattttcgcataaaattttaaaatgtaggttcgatcttatgagatttgtagtcaaaagagctcatatgtattcaggtaggctgtag  
cgagaccaactaatagcatgacaagcattttcaatttgcctggagcgcgaattgggtttttattcgaatcgcacatttctgttccccata  
atataaaatttcaggacgatataattacattcttcacaaaatattgcattacagacaccgacaagaatctccacctgatatgaaaac  
aatgagccaacaatgttatctgtattgccaccaccacatttctagtcattcagtatattgtttcaattgaatcattgcaggtatataatcga

attgaacttgaaggctcatcttcatttctcaatacatcatccatcattccagagcagctccggccacacaaaaattgggtggcggctgat  
attgataatcgactctttgacgtgacctgacggagcagcaaaaggagcactgataagacaatgaagaactaaaaaattgtctcggtt  
ttcagcttttagttctgcagcactttatTTTTTTTctctattttccgcattttcctaactttctgatgtccatttcaaatgattttgtataaaaattggtt  
aatttcaggggcactaaaacctacaaaaccataaaaa

ehbp-1:

atggcgggtattcttcgtcgacttcggagatccaataagaaagctgccaaatttagatttacagttactcttcagggttcgttcttgatactttta  
tctcaattgtttattatttaggaattacatctctacaccgacgaacaatggaaaccagaaaaccttcagtttctttcggtcataggtgaata  
cattttcttatcaagaataataaatgtcaatcagaaaaatagacacaatgcatcatgatcattatggaaatttgaaaaaa aaagaaaaa  
tattcacaagaaaataatacgaatcgaataaataaaaaaattgttcatgaaacctttatcatacaatttttacagacgacgaaaagtat  
catcaaaggaacgaaaatgggaagaatgttcggacgctaacaatgtttgattatgtggcctgagcaattttcagagaatatagatatt  
cttacaacattatctgattgcaagtgtatgaatgaagataaagaatggacgattgttgaagaagtaactgctaaaggaaaaag  
aaaagcaattgcagcagtgccactcaatgttcgcttatttcttggatctaccgatcataaaagtgaactgaagctcaagctccgtcc  
attgacgcctcatttgaaattgttccctgattattcttcttggaaagttctcttatttcggaagtaaatgcagatgatgtagtattctcgtcag  
ctgcagcctcttttggtaaaaagttccagtaacagatgaagttgatgcgagtgcaaatgattccagagcagcaggtattttgattgaaa  
aaatacagtttatttcacataatttgttttaagctgcaagacaacaaatcgacacgacagctacaaaaatgatggaatggatcaaaag  
aggaaaaggaaatcgctccgcctattgttcagcacaccgaaaaccttcggagagaatgaaaacctgcaaaaaggtaattagaa  
atcgtttttaaacctaatcgttagaattttggctagaatattttcatgaaaaaagtcataatagcctaaattcgtgtgtggtcatcaaaaaat  
ttgtagattttttcatttttttcaaggaacatcgaatacgaaaaaaaatcgaataatccagaaaatgatatacaaaaattgtttat  
gtgatgaagaaaaggattaaaaaaccaataaatactcgaatttttttcaattttcggaaaacgaaaaatcgaaaaaccg  
acaccctgtggctcttataagaatgtatttcagttcgtcccaatggagagtacagctgaagaagaaaaaacgtcacaccagcagctc  
cagcgccaattgcaaccaacagacatagtcggtcaagccgtgcttcgacagaagaaaaagcgtctacaacaatagaattccgtgtg  
gattccaattctcggcatgttcagttacagcaatcgtacaccatattatctcaaagtggaacaatgagtagagggattgtttggttact  
tttctacaatcataattttttcaatttcagaagatcaaatctcggagagctccatctagagatgctgtccctcaaccgatcgtaggaga  
gactttactttcatggtgacagagagttaacggatattcgcattgaaaagttaatgattttatgaaatcttgaacaacggattggcctt  
gtgtgcagttcttattctatcgtccggatctcattggagattcgaaacactggatattcttaataatgtctggacgcatttcgaatattc  
aaagagccctcgattcacttcttgataggaataacagaagtccaacagttgatatttctgactcctgatcggaaacaaatagaat  
ttcttctcaacatcttcgccaatcttgaaggattgacgagggatctacaccagccagtgctctgatcacagaatatccagaacattt  
ggaattaatgaatccgaagaaaaagttgttgcacattacagaaatcgaatacaaaaagatctcgaagaagctgtggattatagac  
acattcctgatgaagttcctgttacaccacagttggctagtcgcaatccggctctcaatcaaccaactgacgctgatgacgatgatgctg  
aaactcaaatatgctgctttgagagaagtaatgaagcacaacatgggtgactccaggagttggagcaattcgtgcatcgggtgagtttt  
attgaaaaaaattttaaaattttaaatatttagttttgtttttgttgaaattcgaattgaataatgctaatttttaa aatagttatgaaatc  
tttttacttcaattctaccatttttaagatactttgtgtgataataactgaaattataggaaaaaacaggttctttcaatcgtcagatttct  
tggatattttcttatttttttaaatgcaatttataaggttatacataactgaacatttctactaccatataacagcttgataaaaattgcca  
cacaacttaaaaaacttataaatactcgccttataaaactcaattacattgttccagcgaaatagctaatcaattcttttctaataag  
atatccaattttacgagattctatttttgaaaatctttcaactttcagaatcgtgcatcaccttcaaaagcgagatgaactacgccaaga  
gcacgtgatttaattgaaaaatcaacaactcctgcagcaaacacaaatcacggaaaagcagtgatgaaga gagaagacgcgaa  
gaggtcagacggatgctgaacgaaagcagc atccaacgggtgagaagtttttaaaaacacaaaagttgtcgtgattctctatagta  
atctcctttgttgattgttttaattattctaccgtgtgttcccatttcagcaatccctctacttcatcatcaccatataccactttccgtcgtatc  
gatggatcaataccgatcttcgtcgtattggtttgaacattttcagatcatgctccgatttaattgttttagtgttgacaaagcatgtagt  
aatttattttcagaactcgtatgacacaagttcaagaaacgtgatccatctccgacgctcgtccgaaacaatgtacattttattttctc  
atagtgacgtgatttttaacatgcaattgcattattaggaacaatttcatttaattttgttttaattacagacgatcccaatgatactcctcatg  
tgccagcaattggtcgtggcagaacaatggaaatcgggtcagtcattaatataatttaaaattctcggcatttctgtcctactttctccacct  
tttgcctccggcaaaaagggtgggagaaagaagacgcgaaatgccgagttaacagtttaatcccgaatagagcattattggcaaca  
ccgattcaggaaaaatatgtgtacccttaaaagatacagttactcaaatcctcgttgggtgaggtattttcatagattttcatagttttcgataa  
aacTTTTTTTTataaaaaactaaaataaaacaataaaacacacataaatttaaaaaaaactatgaagaatcgtgaaatcgcaca  
aatacagagccttgaaaccttgcgtcaagaccagctaccgtatattttgtcgaactattttgtcagtgtaataagttgtctgattttcaatt

taaacatttgagtattatnttaagctttaaatatgaatggtgcaattagctgtcaataccactagcaatcctcatttctatctaaccataatntttc  
tttcgctgatattatcttttagtcttctctgttctataatntttctttttatcatacaccgcattgtacagatgcctaacaagtgnttgctcacatttcag  
aacgattcatcaactccttcacagcttctacatttgatcgtgtcaagagatatgggagatgcgtagtgacagaattgaaagaatcgtgac  
agttgatggcgaaacaatacggatacatggtttgtgatggttaaaaaagtgtaaatgtaaatgattttgcttctatnttaatacaataaaatntta  
atcatgggtgcaaatgaaagttaccgtctaaatgttattatnttttagggaaacgatttcgaatcatcttcgcaagacgctctggcgacacc  
aaccaaaaagttcttcccaatgggaaaaagacgtcgtgacgttgaaggaaccgccaatgagctgttcgattgacgaacgtata  
tcggatattacagcacaagccgatgtaagattctgagaattaaaggattaattcagtttggnttttcagggtattcaagacaagatcgt  
gaaacagaagttggaagttcagaagaagaaatgttgactgcacatatacttgagttgacaaatgaacggaacactctgtacatcgac  
aggaatactataatcattgagacaattcgtcaggttacttcggaaattgaccaattgggaaaaacaaatcaatgaagttcctgatgatt  
ccctcgttctgatgagaataagacggcaacggataaactgattgaacaatatagtgatgctatgaaaacaaaaagtaacttggttcaa  
aagttatnttgcaactgaggacgaaatgtaagtttattgctttgtgaaccacgtggtgacaggctgtcccacacggttgatctacaaaa  
aatgctggaatntttgcctaagaaagtgccgtcagcacgttctaaccatgcgaaatcagttgagaactcttcgtctcaacttccgaatntt  
ttgtagatctacgtagatcaaacggaatgggacattctgacaccacgtaataaactactttcagtgaaactaatgaaacaacattcgaa  
atnttcagcgaagaagattcggatcgttgaagaaccttactttggatagggtactcgttggctgtggaatagatcagcctgtttcagca  
tcgaagcgacttattcaatgggtggcgccgtaa

ehp-1 3' UTR (predicted):

tacgcttcaacgttatttactcaatntaaaactacgggtcttcttcttctgaaaacaaagtttctccagtgctcctttgttatcttctatca  
tttttctcctttccataattcactcttcccggtttttggcaatnttttaggagttaatcaaaacatcaaatntttctctatctttctatctatgtgat  
atntttgattcagtttcttctcctcgggtgcacacaaatcctcagcttcaataaatcaattcagagttntaaatgatgttcagcaa  
aaattcattcgaaaaaaga

**pGIL122 (cloned into pCFJ356 multiple cloning site using Gibson):**

vha-6p:

gcatgtaccctttataggtgcgctctacgcaattcaccagctgaacaatggagttgagcctaataactaaaatnttgaatgctttac  
aaaaatattatnttcagatcttcgagatcatgaaaactatcaaacagcagcgccctggagcaatcagatcgttccacaatattcagggtg  
atatgcaatcgttttagactacatttcggaatgtgacttcagagataaactgtaattatnttaaatcagcgcgaacgcggagaaag  
tctgatcctgttaacaataacataaatcgttctcgtgatctcacggagatattgccagcatgctcaacggttcagtgatgaatcaa  
gcacagaactgcattaagtatactatnttactcgatactttgttcacataggtntntaaatcattnttatgcatcatttatcatattcaatgca  
tcattcatatcatagcaataaaaaggtgatttctcatgttctggnttcaaatgctgactttggtaaaaagaacgcgtgcctgcctattgcct  
atcttggcattnttctcgataaattntaaatgtaggttcgatcttatgagattgtagtcaaaagagctcatatgattcaggtaggctggtgag  
cgagaccaacttaatgcatgacaagcattntcaattgcccctggagcgaattggtnttattcgaataatgcacattctgttcccata  
atataaaatnttcaggacgatataattacattcttcacaaaatattgcattacagacaccgacaaaagaatctccacctgatgaaaac  
aatgagccaacaatgttatctgtattgccaccaccacattcctagtcattcagatataatgnttcaattgaatcattgcaggtatatacga  
attgaactgtaaggctcattctcatttcaatacatcatccattccagagcagctccggccacacaaaatgggtggcggtctgat  
attgataatcgaacttcttgacgtgcctgacggagcagcaaaagcggagcactgataagacaatgaagaactaaaaatgtcttcggtt  
ttcagcttttagttctgcagcactnttntttgttctcctatntttccgcatnttctcaacttctgatgtccatttcaaatgattnttataaaaatgntt  
aattcagggcgactaaaacctacaaaacccataaaaa

hsp-4 ERSS:

ATGAAAGTTTTCTCGCTGATTCTGATAGCATTTCGTAGCGAATGCGTATTGT

mRuby:

AACTCTTATCAAGGAAAACATGCGCATGAAGGTTGTTCTTGAGGGATCTGTTAACGGAC  
ATCAGTTCAAGTGCACACTGGAGAAGGAGAAGGAAATCCATACATGGTATGTGATACATGGAA  
ATAGGCACATTCATTAATATTTGTATTTTCAGGGAACCTCAACTATGCGCATCAAGGTTAT  
CGAAGGAGGACCACTTCCATTCGCTTTTCGACATCCTTGCTACCTCTTTCATGTACGGATCT  
CGCACTTTCATTAAGTATCCAAAGGGAATTCCAGATTTCTTCAAGCAGTCTTTCAGGAAAGG  
ATTCACCTGGGAGCGCTTACCCGCTACGAGGATGGAGGAGTTATCACCGTTATGCAAGA  
TACCTCCCTTGAGGATGGATGCCTTGTTTACCACGCTCAAGTTCGTGGAGTTAACTTCCA

TCTAACGGAGCTGTTATGCAGAAGAAGACTAAGGGATGGGAACCAAACACTGAAATGATGT  
ACCCAGCTGATGGAGGACTTCGCGGATACACCCACATGGCTCTTAAGGTTGATGGAGGAG  
GACACCTTTCTTGCTCTTTCGTTACCACCTACCGCTCTAAGAAGACTGTTGGAAATATTAAG  
ATGCCAGGAATCCATGCTGTTCGATCACCGTCTTGAGCGTCTTGAGGAGTCTGATAACGAGA  
TGTTTCGTTGTTCAACGTGAGCACGCTGTTCGCTAAGTTCGCTGGACTTGGAGGAGGA

unc-54 3'UTR:

AACTCTCTTATCAAGGAAAACATGCGCATGAAGGTTGTTCTTGAGGGATCTGTTAACGGAC  
ATCAGTTCAAGTGCCTGGAGAAGGAGAAGGAAATCCATACATGGTATGTGATACATGGAA  
ATAGGCACATTCATTAATATTTGTATTTTCAGGGAACCTCAAACATGCGCATCAAGGTTAT  
CGAAGGAGGACCCTTCCATTCGCTTTTCGACATCCTTGCTACCTCTTTCATGTACGGATCT  
CGCACTTTTATTAAGTATCCAAAGGGAATTCCAGATTTCTTCAAGCAGTCTTTCCAGAAGG  
ATCACTTGGGAGCGCGTACCCGCTACGAGGATGGAGGAGTTATCACCGTTATGCAAGA  
TACCTCCCTTGAGGATGGATGCCTTGTTTACCACGCTCAAGTTCGTGGAGTTAACTTCCA  
TCTAACGGAGCTGTTATGCAGAAGAAGACTAAGGGATGGGAACCAAACACTGAAATGATGT  
ACCCAGCTGATGGAGGACTTCGCGGATACACCCACATGGCTCTTAAGGTTGATGGAGGAG  
GACACCTTTCTTGCTCTTTCGTTACCACCTACCGCTCTAAGAAGACTGTTGGAAATATTAAG  
ATGCCAGGAATCCATGCTGTTCGATCACCGTCTTGAGCGTCTTGAGGAGTCTGATAACGAGA  
TGTTTCGTTGTTCAACGTGAGCACGCTGTTCGCTAAGTTCGCTGGACTTGGAGGAGGA
